# Supplementary material
Source: publisher site journal article supplement (https://www.dovepress.com/article/327048)
Supplement: Supplementary file 1 [file get_supplementary_file.php]

Supplementary material

Table S1 – Procedure location and complications

|  | unilateral | bilateral |
| --- | --- | --- |
| Procedures | 16 | 30 |
| RUL | 7 | 25 |
| LUL | 3 | 25 |
| RLL | 3 | 5 |
| LLL | 3 | 5 |
| Post procedural pneumonia | 3 | |
| Post procedural pneumothorax | 4 | |
| hemoptysis | 3 | |

RUL- right upper lobe; LUL- left upper lobe; RLL-right lower lobe; LLL-left lower lobe

Table S2. Within group comparison of estimated marginal means of six-minute walk test distance, FEV1 and residual volume in the ECT and control groups.

|  |  | n | Baseline | 6 months | 12-24 months | P value | |
| --- | --- | --- | --- | --- | --- | --- | --- |
| Overall | Baseline vs 24 months |
| Endobronchial Coils | 6MWT | 23 | 331.0±101.4 | 372.9±76.8 | 338.8±104.8 | 0.04 | 1.0 |
| FEV1 | 32 | 0.86±0.38 | 0.92±0.37 | 0.82±0.36 | 0.003 | 0.75 |
| RV | 25 | 5.28±1.59 | 4.91±1.43 | 5.07±1.30 | 0.45 | 1.0 |
| Control | 6MWT | 26 | 316.4±106.7 | 298.9±117.3 | 290.6±109.1 | 0.07 | 0.14 |
| FEV1 | 43 | 0.88±0.35 | 0.87±0.45 | 0.82±0.36 | 0.04 | 0.06 |
| RV | 24 | 4.10±1.54 | 4.23±1.9 | 4.72±1.96 | 0.052 | 0.04 |

6MWTD- six-minute walk test distance; FEV1- forced expiratory volume in the first second;

RV- residual volume.
